# Supplementary material for: Molecular characterization, function, tissue differential expression, and single-nucleotide polymorphism of buffalo TP53 gene
Source: Copernicus journal article supplement (doi:10.5194/aab-67-217-2024), 2024-05-21
Supplement: Supplementary file [file aab-67-217-2024-supplement.pdf]

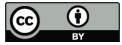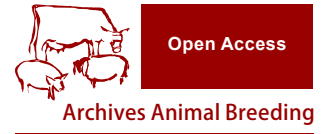

*Supplement of*

## **Molecular characterization, function, tissue differential expression, and single-nucleotide polymorphism of buffalo *TP53* gene**

**Lige Huang et al.**

*Correspondence to:* Yongwang Miao (yongwangmiao1@126.com)

The copyright of individual parts of the supplement might differ from the article licence.

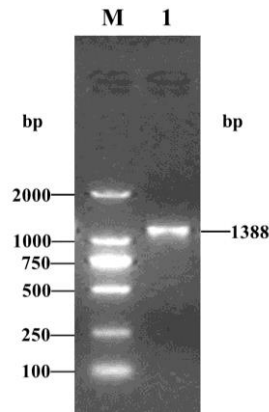

Figure S1 PCR product of buffalo *TP53*. M, DL2000 DNA Marker; 1, the sample from the mammary gland

|            |    | Percent Identity |      |      |      |       |      |       |      |       |      |      |    |                              |
|------------|----|------------------|------|------|------|-------|------|-------|------|-------|------|------|----|------------------------------|
|            |    | 1                | 2    | 3    | 4    | 5     | 6    | 7     | 8    | 9     | 10   | 11   |    |                              |
| Divergence | 1  |                  | 99.7 | 98.3 | 98.4 | 98.3  | 98.4 | 98.3  | 96.2 | 96.2  | 96.0 | 93.0 | 1  | Buffalo_OL456217(this study) |
|            | 2  | 0.3              |      | 98.2 | 98.1 | 98.2  | 98.1 | 98.2  | 96.0 | 96.0  | 95.9 | 92.9 | 2  | Buffalo_NM_001290844.2_X1    |
|            | 3  | 1.7              | 1.8  |      | 99.6 | 100.0 | 99.6 | 99.6  | 96.2 | 96.2  | 96.0 | 93.0 | 3  | Cattle_NM_174201.2           |
|            | 4  | 1.7              | 1.9  | 0.4  |      | 99.6  | 99.8 | 99.8  | 96.4 | 96.4  | 96.2 | 93.2 | 4  | Yak_XM_005894802.2           |
|            | 5  | 1.7              | 1.8  | 0.0  | 0.4  |       | 99.6 | 99.6  | 96.2 | 96.2  | 96.0 | 93.0 | 5  | Zebu_XM_019982111.1          |
|            | 6  | 1.7              | 1.9  | 0.4  | 0.2  | 0.4   |      | 100.0 | 96.4 | 96.4  | 96.2 | 93.2 | 6  | Bison_XM_010843072.1_X1      |
|            | 7  | 1.8              | 1.9  | 0.4  | 0.2  | 0.4   | 0.0  |       | 96.2 | 96.2  | 96.1 | 92.6 | 7  | Bison_XM_010843073.1_X2      |
|            | 8  | 3.9              | 4.1  | 3.9  | 3.7  | 3.9   | 3.7  | 3.9   |      | 100.0 | 99.6 | 96.4 | 8  | Goat_XM_005693530.3_X1       |
|            | 9  | 3.9              | 4.1  | 3.9  | 3.7  | 3.9   | 3.7  | 3.9   | 0.0  |       | 99.6 | 96.4 | 9  | Goat_XM_018064593.1_X2       |
|            | 10 | 4.1              | 4.2  | 4.1  | 4.0  | 4.1   | 4.0  | 4.0   | 0.4  | 0.4   |      | 96.7 | 10 | Sheep_NM_001009403.1_X1      |
|            | 11 | 7.3              | 7.4  | 7.3  | 7.1  | 7.3   | 7.1  | 7.8   | 3.7  | 3.7   | 3.4  |      | 11 | Sheep_XM_042255225.1_X2      |
|            | 1  | 2                | 3    | 4    | 5    | 6     | 7    | 8     | 9    | 10    | 11   |      |    |                              |

Figure S2 Consistency between the CDS sequence obtained in this study and the CDS sequences of *TP53* in NCBI database

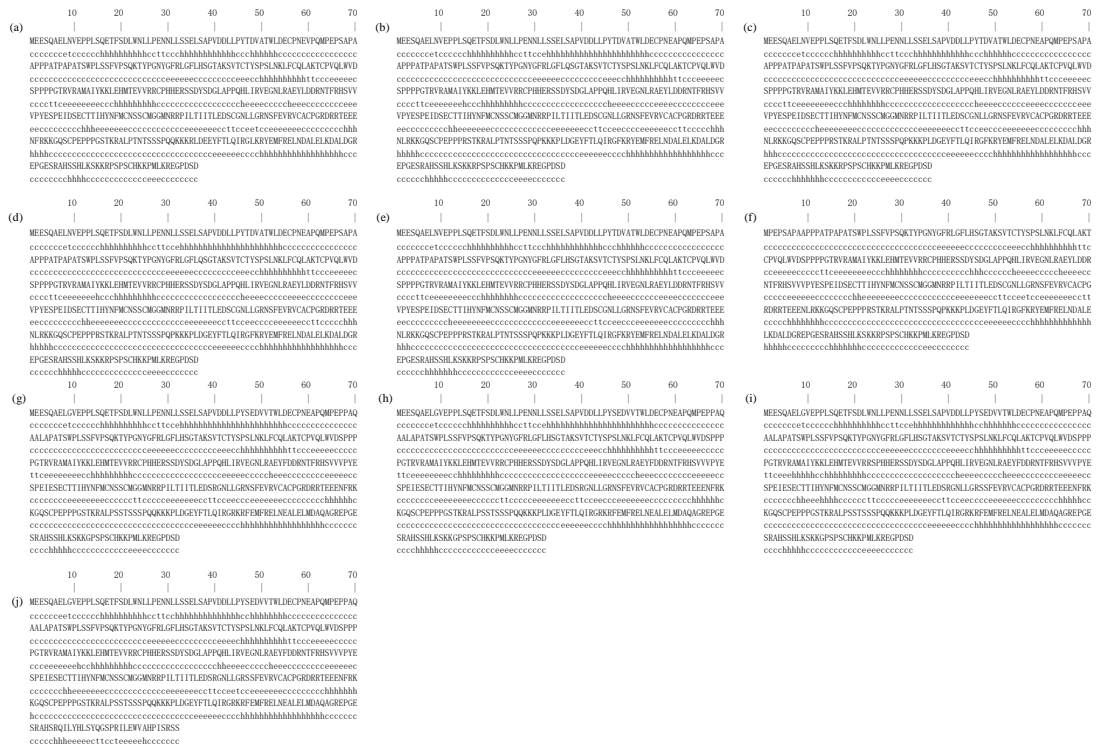

Figure S3 The secondary structure of TP53 for buffalo and other species of Bovidae. The composition of secondary structure of TP53 is represented by a single letter below its amino acid sequence: h, alpha helix; e, extended strand; t, beta turn; c, random coil. (a), Buffalo (UHH90219.1); (b), Cattle (NP\_776626.1); (c), Yak (XP\_005894864.1); (d), Zebu (XP\_019837670.1); (e), Bison (XP\_010841374.1); (f), Bison (XP\_010841375.1); (g), Goat (XP\_017920082.1); (h), Goat (XP\_005693587.1); (i), Sheep (NP\_001009403.1); (j), Sheep (XP\_042111159.1).

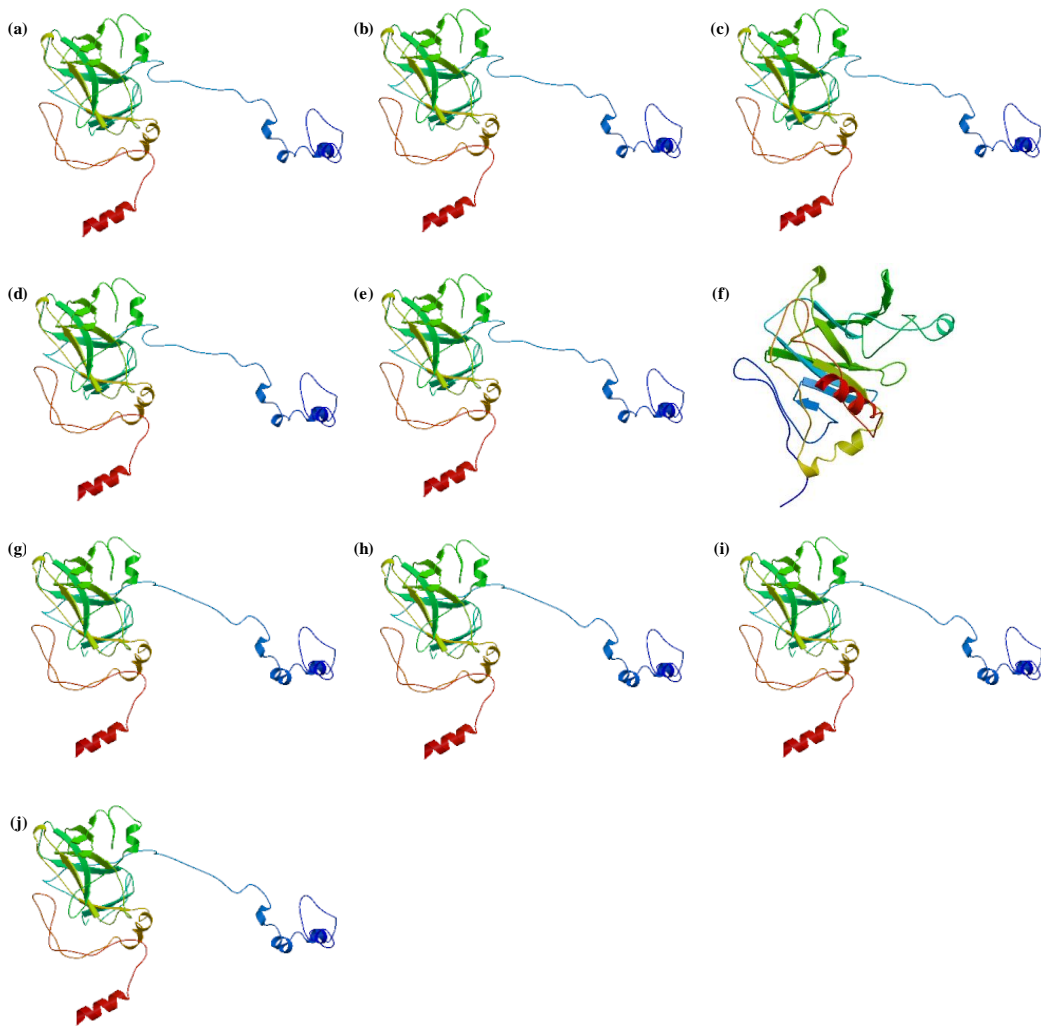

Figure S4 The three-dimensional structures of TP53 for buffalo and other species of Bovidae. The coverage rate of TP53 sequence in buffalo (UHH90219.1), cattle (NP\_776626.1), yak (XP\_005894864.1), zebu (XP\_019837670.1), bison (XP\_010841374.1), goat (XP\_017920082.1), goat (XP\_005693587.1), sheep (NP\_001009403.1) with template 6xre.1.M (human) sequence was 100 %, and the sequence consistency was 80.26%, 81.30%, 81.56%, 81.30%, 81.56%, 81.10%, 81.10% and 80.58%, respectively. While, the coverage rate of TP53 sequence in bison (XP\_010841375.1) with template 6xre.1.M sequence was 98%, and the sequence consistency was 86.44%. The coverage rate of TP53 sequence in sheep (XP\_042111159.1) with the sequence of template 6xre.1.M was 93%, and the sequence consistency was 81.07%. (a), Buffalo (UHH90219.1); (b), Cattle (NP\_776626.1); (c), Yak (XP\_005894864.1); (d), Zebu (XP\_019837670.1); (e), Bison (XP\_010841374.1); (f), Bison (XP\_010841375.1); (g), Goat (XP\_017920082.1); (h), Goat (XP\_005693587.1); (i), Sheep (NP\_001009403.1); (j), Sheep (XP\_042111159.1).

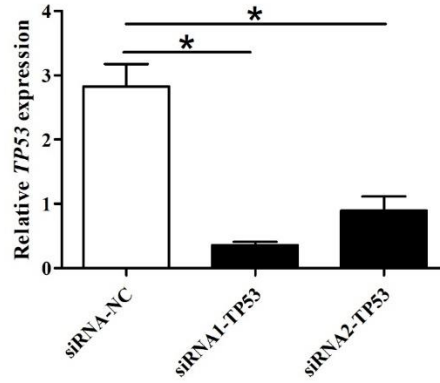

Figure S5 Evaluation of two pairs of siRNAs for *TP53* interference efficiency in BuMECs. The values are presented as means  $\pm$  SEM; \*,  $p < 0.05$ ; \*\*,  $p < 0.01$ .

```

1111122222222222222223333333333333333
34 5666770689901156677899000111233444678
987 0079277838988940134257234158819478740
B1 NAT-AVSPPPHPCPYLSIDCRNRDFGTPTNQRELYDKLDRKR
B2 .....
B3 .....
Cattle_hap1 ...-A...RQ..S.....LR...PPGF.....
Cattle_hap2 ...-A...Q.....LR...PPGF.....
Cattle_hap3 ...-A...Q.....LR...PPGF.....
Cattle_hap4 ...-A...Q.....LR...PPGF.....
Cattle_hap5 ...-A...Q.....LR...PPGF.....
Cattle_hap6 ...-A...Q.....LR...PPGF.....
Cattle_hap7 ?..-A...Q.....LR...PPGF.....
Cattle_hap8 ?..-A...Q.....LR...PPGF.....T
Yak_hap1 ...-A.....LR...PPGF.....
Yak_hap2 ...-A.....V.....LR...PPGF.....
Yak_hap3 ...-A.....LR...PPGF.....
Zebu_hap1 ...-A...Q.....LR...PPGF.....
Zebu_hap2 ...-A...Q.....V.....LR...PPGF.....
Bison_hap1 ...-A.....LR...PPGF.....
Goat_hap1 G.SEVAPQL?...F..ER.....SS.PGRFEMQAG..
Sheep_hap1 G.SEVAPQL?...F..ER.S.....SS.PGRFEMQAG..
Sheep_hap2 G.SEVAPQL?.S..F..ER.S.....SS.PGRFEMQAG..

```

Figure S6 Differential sites for amino acid sequences of TP53 between buffalo and other species of Bovidae. Numbers indicate the position of the coding region. Point (·) indicates consistency with the B1. Nucleotide substitutions are represented by different letters. Missing information is marked with a question mark (?). A horizontal line (-) indicates a deletion in the sequence.

Table S1 The information of primers used in this study

| Gene          | Serial number of template | Primer sequence (5'→3')*                                 | Product length (bp) | Annealing temperature (°C) | Extension time (s) | Purpose                    |
|---------------|---------------------------|----------------------------------------------------------|---------------------|----------------------------|--------------------|----------------------------|
| <i>TP53</i>   | XM_006062871              | F: CGGGGTCATCTAGCGTCC<br>R: CACCAAGCAGAGGTCTAAGCA        | 1388                | 63.9                       | 84                 | Gene cloning               |
| <i>TP53</i>   | OL456217                  | F: ATGGAAGAATCGCAGGCAGAACT<br>R: ATTTGGGGCACTTCATTCGGACA | 188                 | 60.2                       | 12                 | Expression level detection |
| siRNA1-TP53   | OL456217                  | F: GGAAUUUACGCGCAGAGUATT<br>R: UACUCUGCGGUAAAUUCCTT      | /                   | /                          | /                  | Gene interference          |
| siRNA2-TP53   | OL456217                  | F: GCUCCCGUACACAGAUGUUTT<br>R: AACAUUGUGUACGGGAGCTT      | /                   | /                          | /                  | Gene interference          |
| siRNA-NC      | /                         | F: UUCUCCGAACGUGUCACGUTT<br>R: ACGUGACACGUUCGGAGAATT     | /                   | /                          | /                  | Negative control           |
| <i>PI3K</i>   | XM_006069974              | F: CAGTCACCTCTCAACCCA<br>R: GCCGTAATCATCACCAT            | 160                 | 60                         | 30                 | Expression level detection |
| <i>AKT1</i>   | NM_001290841              | F: CCAAGTCCCTGCTCTCGG<br>R: TTCGCTGTCCACCCCTC            | 266                 | 60                         | 30                 | Expression level detection |
| <i>mTOR</i>   | XM_025285881              | F: ATGCTGTCCCTGGTCCTTATG<br>R: GGGTCAGAGAGTGGCCTTCAA     | 178                 | 60                         | 30                 | Expression level detection |
| <i>EIF4E</i>  | NM_001319800              | F: GATGGGCACTCTGGTTTT<br>R: CCTCCTCGTTTGTTTTTC           | 208                 | 60                         | 30                 | Expression level detection |
| <i>S6K1</i>   | XM_006065441              | F: TGCTGCTTCTCGTCTTGG<br>R: GGTTGGCACTTTCCTGA            | 224                 | 60                         | 30                 | Expression level detection |
| <i>CSN2</i>   | XM_006071124              | F: GGCTCCTAAGCACAAAAGA<br>R: AGGGGAAACATGACAGT           | 172                 | 60                         | 30                 | Expression level detection |
| <i>SREBF1</i> | XM_025280442              | F: GCACCGAGGCCAAGTTGAATAA<br>R: CAGGTCCTTCAGCGATTTGCTT   | 146                 | 57                         | 30                 | Expression level detection |
| <i>PPARG</i>  | NM_001290893              | F: GCTCCAAGAGTACCAAAGTG<br>R: GTCCTCCTGAAGAAACCCTT       | 204                 | 53.7                       | 30                 | Expression level detection |
| <i>FASN</i>   | XM_006061793              | F: AGGCCAGTCCGAAGGCAACA<br>R: TACCACGTCCGCCACTTGTGTC     | 209                 | 64.3                       | 30                 | Expression level detection |
| <i>ACACA</i>  | XM_025281124              | F: CCTCTTCAGACAGGTTCAAGC<br>R: TTCACCGCACACTGTTCCA       | 234                 | 55                         | 30                 | Expression level detection |
| <i>SCD</i>    | NM_001290915              | F: CGTGCCGTGGTATCTGTGG<br>R: AAAGGTGTGGTGGTAGTTGTGG      | 217                 | 56.2                       | 30                 | Expression level detection |
| <i>ACTB</i>   | NM_001290932              | F: TCTTGTCACCTCGTCGTC<br>R: GGCGCATGATCTTGAT             | 145                 | 59.5                       | 9                  | Internal reference         |
| <i>GAPDH</i>  | XM_006065800              | F: ATGGAGAAGGCTGGGGCTCA<br>R: GCAGGAGGCATTGCTGACAA       | 144                 | 60                         | 9                  | Internal reference         |
| <i>RPS23</i>  | XM_006059350              | F: ACCGACGAGACCAGAAGT<br>R: CTCCAGGAATGTCACCAA           | 306                 | 60                         | 19                 | Internal reference         |
| Exon 1        | NC_059159                 | F: GTTACGGTTTTTCGCTTGT<br>R: GAGTTAGTGGTGGTGGGG          | 671                 | 61.8                       | 41                 | SNP detection              |
| Exon 2-4      | NC_059159                 | F: GGTGTGCTGTGGGCGGAG<br>R: AGGCAAAGGCTGAAGTGG           | 795                 | 65.5                       | 48                 | SNP detection              |
| Exon 5-7      | NC_059159                 | F: GTTTTCATCCTTCCCGTC<br>R: AATAACCCATCTGCTCTG           | 753                 | 59.2                       | 46                 | SNP detection              |
| Exon 8-10     | NC_059159                 | F: ACCACATTCTCCCACACT<br>R: AGACCTGGATCACTCACC           | 1099                | 61.4                       | 66                 | SNP detection              |
| Exon 11       | NC_059159                 | F: CCTCCCTTTTCTCCTCTC<br>R: GCTTCCCAAACACTACTCC          | 1027                | 58.6                       | 62                 | SNP detection              |

\*, Primer direction (F: forward; R: reverse).

Table S2 Sequence information of *TP53* gene

| Species              | Accession number of nucleotide sequences | Accession number of protein sequences | CDS length (bp) | CDS status |
|----------------------|------------------------------------------|---------------------------------------|-----------------|------------|
| Buffalo (this study) | OL456217                                 | UHH90219.1                            | 1158            | Complete   |
| Buffalo_X1           | NM_001290844.2                           | NP_001277773.2                        | 1158            | Complete   |
| Buffalo_X2           | XM_006062871.2                           | XP_006062933.1                        | 1158            | Complete   |
| Buffalo_X3           | XM_044938378.1                           | XP_044794313.1                        | 1158            | Complete   |
| Cattle               | NM_174201.2                              | NP_776626.1                           | 1158            | Complete   |
| Yak                  | XM_005894802.2                           | XP_005894864.1                        | 1158            | Complete   |
| Zebu                 | XM_019982111.1                           | XP_019837670.1                        | 1158            | Complete   |
| Bison_X1             | XM_010843072.1                           | XP_010841374.1                        | 1158            | Complete   |
| Bison_X2             | XM_010843073.1                           | XP_010841375.1                        | 972             | Complete   |
| Goat_X1              | XM_005693530.3                           | XP_017920082.1                        | 1146            | Complete   |
| Goat_X2              | XM_018064593.1                           | XP_005693587.1                        | 1146            | Complete   |
| Sheep_X1             | NM_001009403.1                           | NP_001009403.1                        | 1146            | Complete   |
| Sheep_X2             | XM_042255225.1                           | XP_042111159.1                        | 1146            | Complete   |
| Pig                  | NM_213824.3                              | NP_998989.3                           | 1158            | Complete   |
| Deer                 | XM_043903734.1                           | XP_043759669.1                        | 1167            | Complete   |
| Horse                | XM_023651624.1                           | XP_023507392.1                        | 1142            | Complete   |
| Camel                | XM_010996514.2                           | XP_010994816.1                        | 1143            | Complete   |
| Rat                  | NM_030989.3                              | NP_112251.2                           | 1173            | Complete   |
| Human                | NM_000546.6                              | NP_000537.3                           | 1179            | Complete   |

Table S3 Secondary structure composition of TP53 in some domestic animals of Bovidae

| Structer            | Buffalo (this study) | Cattle | Yak   | Zebu  | Bison_X1 | Bison_X2 | Goat_X1 | Goat_X2 | Sheep_X1 | Sheep_X2 |
|---------------------|----------------------|--------|-------|-------|----------|----------|---------|---------|----------|----------|
| Random coil (%)     | 59.07                | 57.25  | 59.07 | 57.25 | 59.07    | 58.33    | 57.07   | 57.07   | 57.85    | 54.45    |
| Alpha helix (%)     | 20.98                | 22.28  | 20.47 | 22.28 | 20.47    | 17.90    | 21.47   | 21.47   | 23.56    | 22.77    |
| Beta turn (%)       | 2.59                 | 2.85   | 2.33  | 2.85  | 2.33     | 2.78     | 2.88    | 2.88    | 2.88     | 2.88     |
| Extended strand (%) | 17.36                | 17.62  | 18.13 | 17.62 | 18.13    | 20.99    | 18.59   | 18.59   | 15.71    | 19.90    |

Table S4 The coverage and consistency between the fragment sequence of qPCR obtained in this study and the TP53 sequence in the NCBI database

| Species    | Coverage (%) | Identity (%) |
|------------|--------------|--------------|
| Buffalo_X1 | 100          | 98.94        |
| Buffalo_X2 | 100          | 100          |
| Buffalo_X3 | 100          | 100          |
| Cattle     | 100          | 98.40        |
| Yak        | 100          | 98.94        |
| Zebu       | 100          | 98.40        |
| Bison_X1   | 100          | 98.94        |
| Bison_X2   | 100          | 98.25        |
| Goat_X1    | 100          | 94.76        |
| Goat_X2    | 100          | 94.76        |
| Sheep_X1   | 100          | 93.72        |
| Sheep_X2   | 100          | 93.72        |

Table S5 Relative synonymous codon usage values of *TP53* gene in buffalo

| Amino acid | Codon | B1   | B2   | B3   |
|------------|-------|------|------|------|
| Phe        | UUU   | 0.91 | 0.91 | 0.91 |
|            | UUC   | 1.09 | 1.09 | 1.09 |
| Leu        | UUA   | 0.16 | 0.16 | 0.16 |
|            | UUG   | 0.65 | 0.65 | 0.65 |
|            | CUU   | 0.97 | 0.97 | 0.97 |
|            | CUC   | 0.81 | 0.81 | 0.81 |
|            | CUA   | 0.32 | 0.32 | 0.32 |
|            | CUG   | 3.08 | 3.08 | 3.08 |
| Ile        | AUU   | 0    | 0    | 0    |
|            | AUC   | 3    | 3    | 3    |
|            | AUA   | 0    | 0    | 0    |
| Met        | AUG   | 1    | 1    | 1    |
| Val        | GUU   | 0.71 | 0.71 | 0.71 |
|            | GUC   | 0.71 | 0.71 | 0.71 |
|            | GUA   | 0    | 0    | 0    |
|            | GUG   | 2.59 | 2.59 | 2.59 |
|            | UCU   | 1.74 | 1.74 | 1.74 |
| Ser        | UCC   | 2.21 | 2.21 | 2.21 |
|            | UCA   | 0.32 | 0.32 | 0.47 |
|            | UCG   | 0.32 | 0.32 | 0.16 |
|            | CCU   | 1.14 | 1.14 | 1.24 |
| Pro        | CCC   | 1.33 | 1.33 | 1.24 |
|            | CCA   | 1.14 | 1.14 | 1.14 |
|            | CCG   | 0.38 | 0.38 | 0.38 |
|            | ACU   | 0.55 | 0.55 | 0.55 |
|            | ACC   | 2.36 | 2.36 | 2.36 |
| Thr        | ACA   | 0.73 | 0.73 | 0.73 |
|            | ACG   | 0.36 | 0.36 | 0.36 |
|            | GCU   | 0.6  | 0.8  | 0.8  |
|            | GCC   | 2.4  | 2.2  | 2.2  |
| Ala        | GCA   | 1    | 1    | 1    |
|            | GCG   | 0    | 0    | 0    |
|            | UAU   | 1.09 | 1.09 | 1.09 |
|            | UAC   | 0.91 | 0.91 | 0.91 |
| Tyr        | UAA   | 0    | 0    | 0    |
|            | UAG   | 0    | 0    | 0    |
| TER        | UAA   | 0    | 0    | 0    |
|            | UAG   | 0    | 0    | 0    |
| His        | CAU   | 0.8  | 0.8  | 0.8  |
|            | CAC   | 1.2  | 1.2  | 1.2  |
| Gln        | CAA   | 0.36 | 0.36 | 0.36 |
|            | CAG   | 1.64 | 1.64 | 1.64 |
| Asn        | AAU   | 0.82 | 0.82 | 0.82 |
|            | AAC   | 1.18 | 1.18 | 1.18 |
| Lys        | AAA   | 0.4  | 0.4  | 0.4  |
|            | AAG   | 1.6  | 1.6  | 1.6  |
| Asp        | GAU   | 0.84 | 0.84 | 0.84 |
|            | GAC   | 1.16 | 1.16 | 1.16 |
| Glu        | GAA   | 0.81 | 0.81 | 0.81 |
|            | GAG   | 1.19 | 1.19 | 1.19 |
| Cys        | UGU   | 1.23 | 1.23 | 1.23 |
|            | UGC   | 0.77 | 0.77 | 0.77 |
| TER        | UGA   | 3    | 3    | 3    |
| Trp        | UGG   | 1    | 1    | 1    |
| Arg        | CGU   | 0.67 | 0.67 | 0.67 |
|            | CGC   | 1.78 | 1.78 | 1.78 |
|            | CGA   | 0.89 | 0.89 | 0.89 |
|            | CGG   | 1.11 | 1.11 | 1.11 |
| Ser        | AGU   | 0.32 | 0.32 | 0.32 |
|            | AGC   | 1.11 | 1.11 | 1.11 |
| Arg        | AGA   | 0.67 | 0.67 | 0.67 |
|            | AGG   | 0.89 | 0.89 | 0.89 |
| Gly        | GGU   | 0.67 | 0.67 | 0.67 |
|            | GGC   | 0.67 | 0.67 | 0.67 |
|            | GGA   | 0.67 | 0.67 | 0.67 |
|            | GGG   | 2    | 2    | 2    |



Table S6 Information for haplotypes

| Haplotype   | Accession number of nucleotide sequences |
|-------------|------------------------------------------|
| B1          | OL456217                                 |
| B2          | XM_006062871                             |
| B3          | NM_001290844                             |
| Cattle_hap1 | DQ656491                                 |
| Cattle_hap2 | NM_174201                                |
| Cattle_hap3 | NC_037346                                |
| Cattle_hap4 | AB571118                                 |
| Cattle_hap5 | X81704                                   |
| Cattle_hap6 | XM_027519387                             |
| Cattle_hap7 | XM_027519388                             |
| Cattle_hap8 | D49825                                   |
| Yak_hap1    | XM_005894802                             |
| Yak_hap2    | NW_005393612                             |
| Yak_hap3    | KR185965                                 |
| Zebu_hap1   | XM_019982111                             |
| Zebu_hap2   | NC_032668                                |
| Bison_hap1  | XM_010843072                             |
| Goat_hap1   | XM_018064593                             |
| Sheep_hap1  | FJ855223                                 |
| Sheep_hap2  | NM_001009403                             |
